# Supplementary material for: PEDF-Mediated Mitophagy Triggers the Visual Cycle by Enhancing Mitochondrial Functions in a H2O2-Injured Rat Model
Source: MDPI journal article supplement (doi:10.3390/cells10051117), 2021-05-06
Supplement: s1 [file s1]

# Figure S1

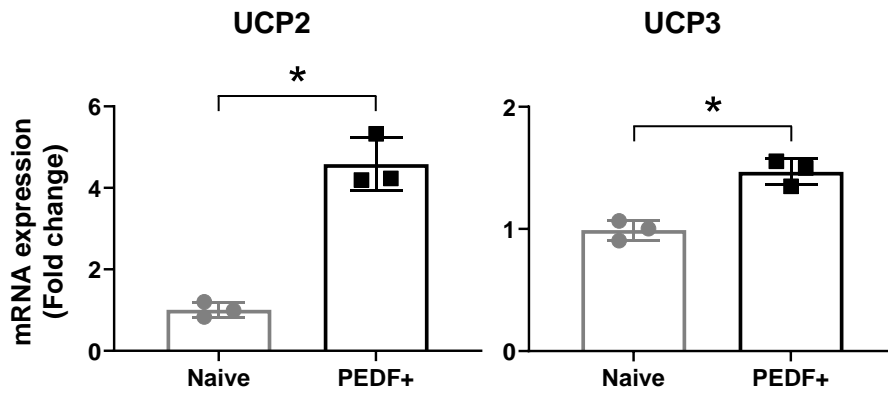

**Figure S1.** The mRNA expression of mitochondrial biogenesis markers (e.g., UCP2 and UCP3) in naïve PD-MSCs (Naïve) and PD-MSCs<sup>PEDF</sup> (PEDF+) by qRT-PCR. The data from each group are shown as the mean  $\pm$  SD and were analyzed by Student's t-test. \* $p < 0.05$  vs. naïve PD-MSCs.

# Figure S2

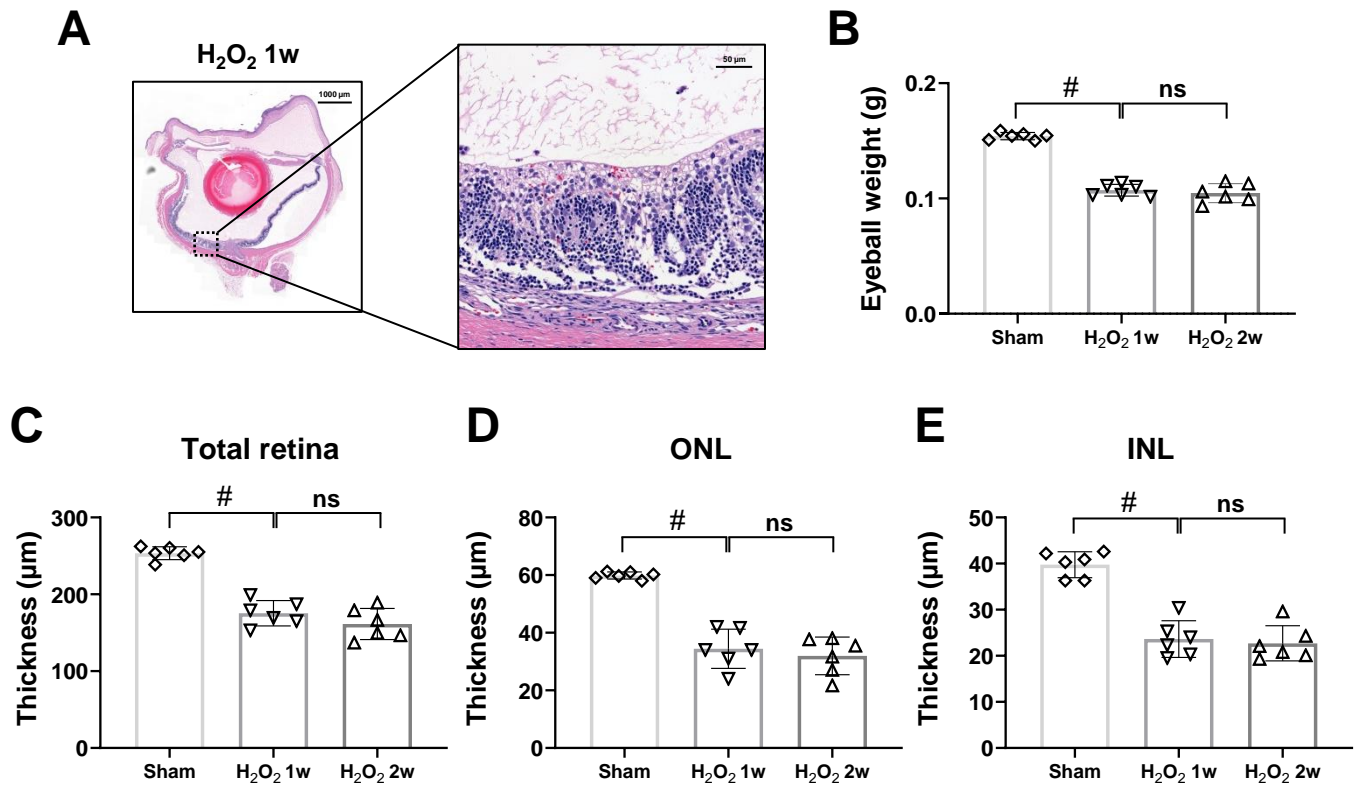

**Figure S2.** H<sub>2</sub>O<sub>2</sub>-injured rat modeling for 1 and 2 weeks. **(a)** Histological images in H&E-stained rat eyeball sections for 1 week. **(b)** Eyeball weight (gram; g) in H<sub>2</sub>O<sub>2</sub>-injured 1 and 2 weeks (n=6/group). Measurement of **(c)** the total retina, **(d)** outer nuclear layer (ONL), and **(e)** inner nuclear layer (INL) in H&E-stained sections (n=6/group). The data represent the mean  $\pm$  SD and were analyzed by one-way ANOVA. #p<0.05 vs. Sham.

# Figure S3

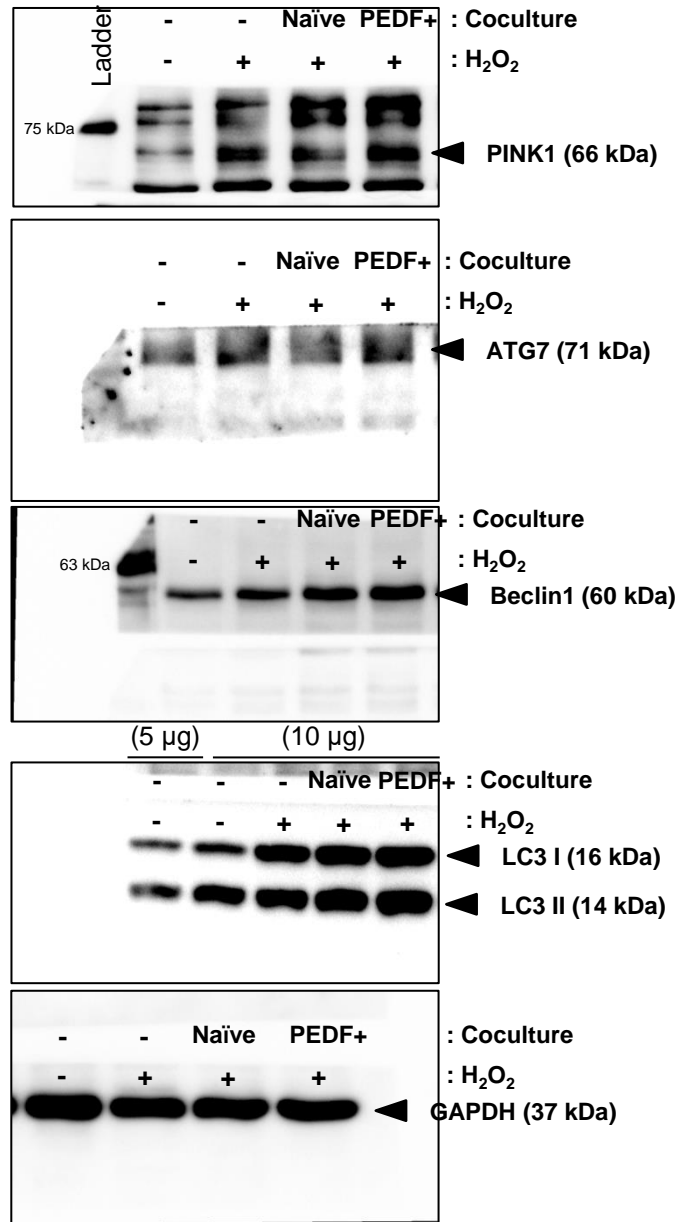

**Figure S3.** Uncropped membrane images by western blotting in  $H_2O_2$ -injured ARPE-19 cells cocultured with naïve PD-MSCs (Naïve) and PD-MSCs<sup>PEDF</sup> (PEDF+)

**Figure S4**

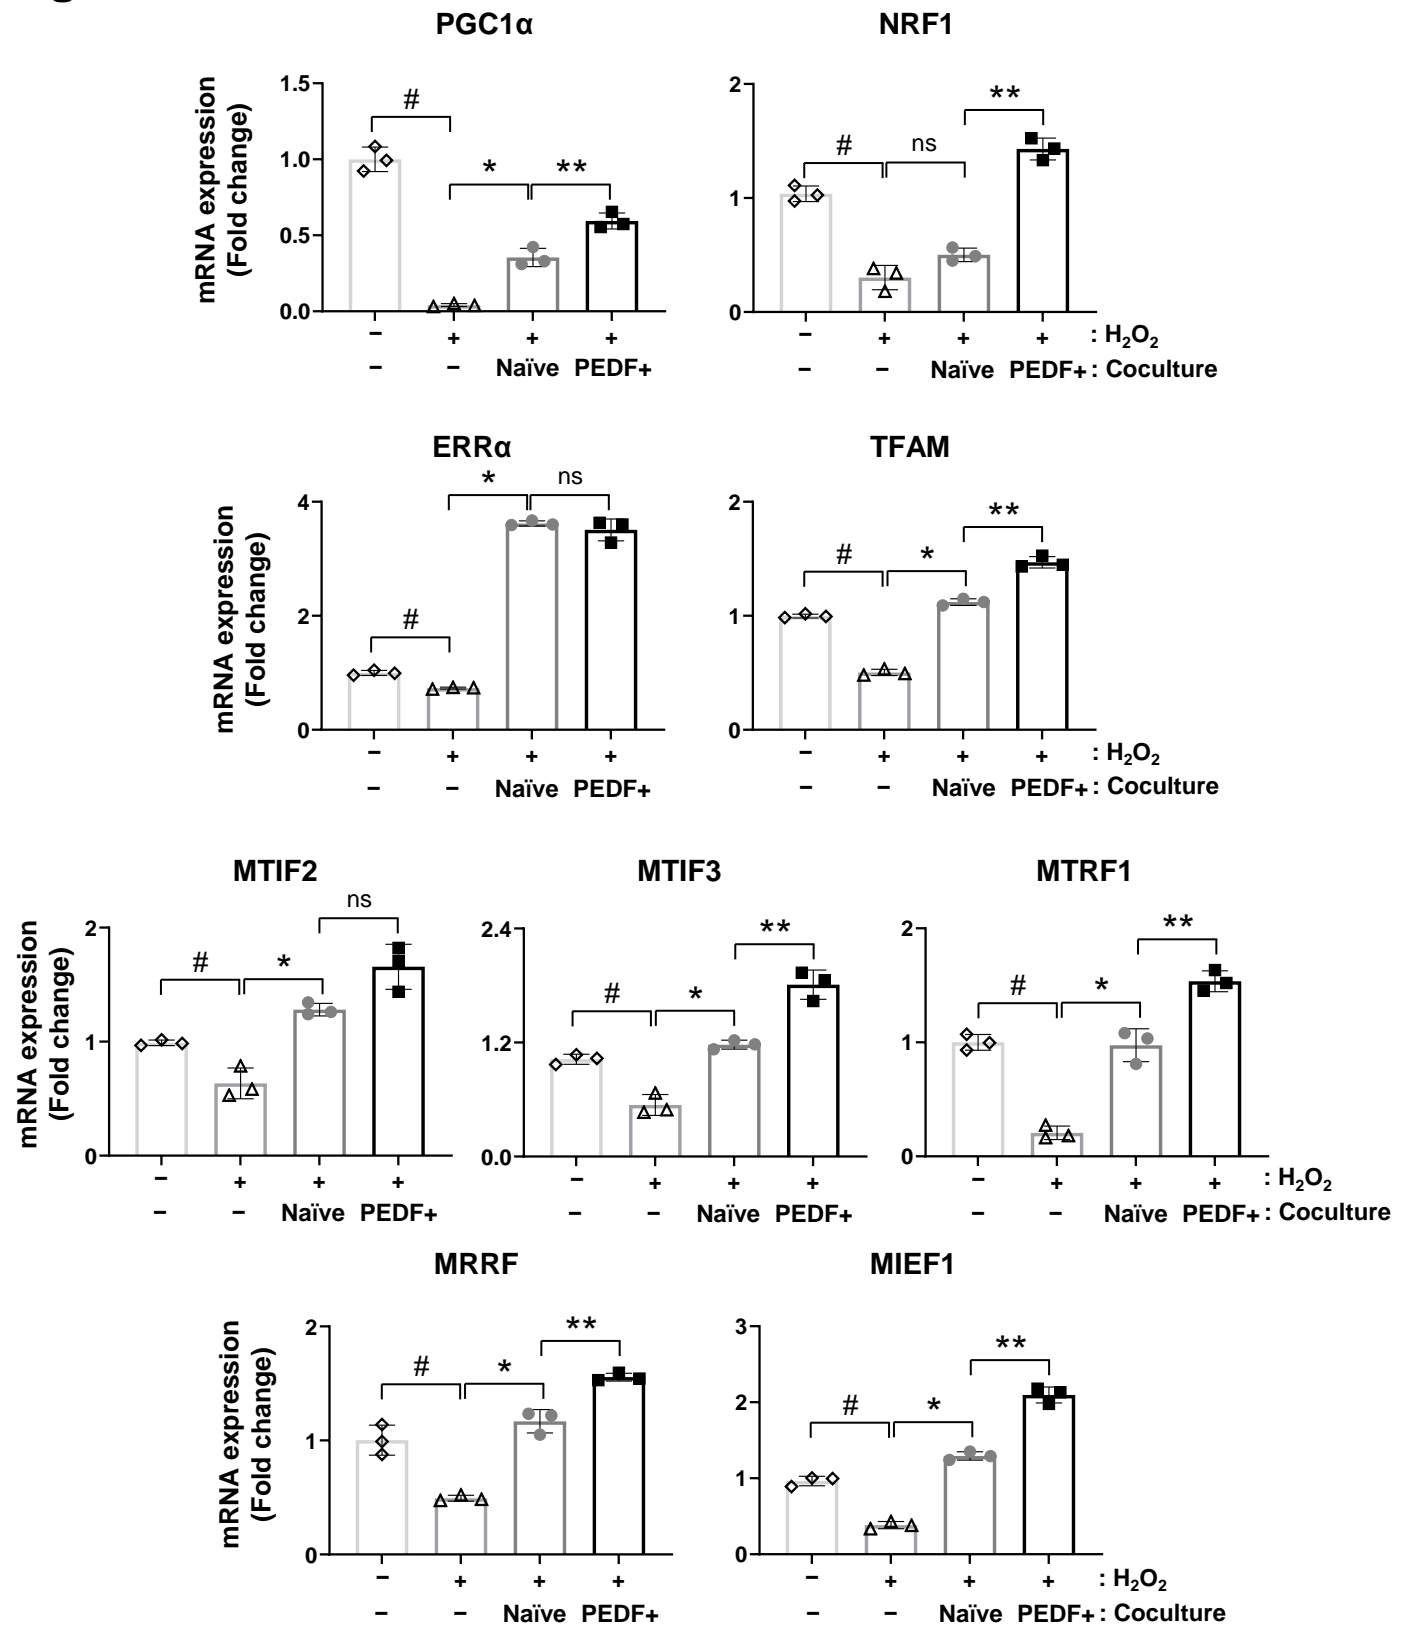

**Figure S4.** The mRNA expression of mitochondrial biogenesis (e.g., PGC1 $\alpha$ , NRF1, ERR $\alpha$ , and TFAM) and translation (e.g., MTIF2, MTIF3, MTRF1, MRRF, and MIEF1) markers in ARPE-19 cells cocultured with naïve PD-MSCs (Naïve) or PD-MSCs<sup>PEDF</sup> (PEDF+) for 24 hours by qRT-PCR. The data from each group are shown as the mean  $\pm$  SD and were analyzed by Student's t-test or one-way ANOVA. #p<0.05 vs. the normal control (-), \*p<0.05 vs. H<sub>2</sub>O<sub>2</sub> treatment, \*\*p<0.05 vs. naïve PD-MSCs.

**Table S1**

| Gene          | Accession number | Sequence (5' – 3')                                                         | Tm (°C) |
|---------------|------------------|----------------------------------------------------------------------------|---------|
| PEDF          | NM_001329903.2   | F: 5'- CCCATGATGTCGGACCCTAA -3'<br>R: 5'- TGTCATGAATGAACTCGGAGGTG -3'      | 55      |
| SIRT-1        | NM_012238.5      | F: 5'- GCCTCACATGCAAGCTCTAGTGAC -3'<br>R: 5'- TTCGAGGATCTGTGCCAATCATAA -3' | 60      |
| PGC1 $\alpha$ | NM_013261.4      | F: 5'- CAGCAAAAGCCACAAAGAC -3'<br>R: 5'- GGGTCAGAGGAAGAGATAAAAGTTG -3'     | 60      |
| NRF1          | NM_005011.4      | F: 5'- GCTTCAGAATTGCCAACCA -3'<br>R: 5'- GTCATCTCACCTCCCTGTAAC -3'         | 60      |
| ERR $\alpha$  | NM_004451.5      | F: 5'- GGCCCTTGCCAATTCAGA -3'<br>R: 5'- GGCCTCGTGCAGAGCTTCT -3'            | 60      |
| TFAM          | NM_003201.2      | F: 5'- GAACAAC TACCCATATTTAAAGCTCA -3'<br>R: 5'- GAATCAGGAAGTTCCTCCA -3'   | 60      |
| MTIF2         | NM_001005369.1   | F: 5'- GCCAAAGATGCACAGGTTCC -3'<br>R: 5'- AGCCATCAGATTATCGCCCG -3'         | 55      |
| MTIF3         | NM_001166263.2   | F: 5'- GCACCAGCACAGTTGTCC -3'<br>R: 5'- CCCAAATCATTGCCCTTCTC -3'           | 55      |
| MTRF1         | NM_001354073.1   | F: 5'- GATCCCTGAGGGGCTGCT -3'<br>R: 5'- TGCCTCAATTTTCTTCCTCGG -3'          | 55      |
| MRRF          | NM_138777.5      | F: 5'- GGGCGATAGCTGTGGATGTT -3'<br>R: 5'- CCTTTCCTTTGGCTTTGGC -3'          | 55      |
| MIEF1         | NM_019008.6      | F: 5'- TCGACACAGATACATTCTGCCC -3'<br>R: 5'- TCACCACCTGCAGGTCATCG -3'       | 55      |
| RDH5          | NM_001199771.3   | F: 5'- CTGTGACCAACCTGGAGAGTCT -3'<br>R: 5'- GATGCGCTGTTGCATTTTCAGGT -3'    | 60      |
| RDH11         | NM_016026.4      | F: 5'- AGCAGGTGTTGGTGCGGAAACT -3'<br>R: 5'- CGGACACATCATCACTCCTGCA -3'     | 60      |
| LRAT          | NM_004744.5      | F: 5'- TGCGAGCACTTCGTGACCTACT -3'<br>R: 5'- GCCAATCCCAAGACTGCTGAAG -3'     | 60      |
| RBP1          | NM_002899.5      | F: 5'- ACGGAGACAAGCTCCAGTGTGT -3'<br>R: 5'- GACCACACCTTCCACTCTCATC -3'     | 60      |
| PINK1         | NM_032409.3      | F: 5'- GGACACGAGACGCTTGCA -3'<br>R: 5'- TTACCAATGGACTGCCCTATCA -3'         | 55      |
| PARKIN        | NM_004562.3      | F: 5'- TGGAGGATTTAACCCAGGAG -3'<br>R: 5'- ACAGGGCTTGGTGGTTTTCT -3'         | 55      |
| LC3           | NM_022818.5      | F: 5'- GAGAAGCAGCTTCCTGTTCTGG -3'<br>R: 5'- GTGTCCGTTACCAACAGGAAG -3'      | 60      |
| ATG7          | NM_006395.3      | F: 5'- CGTTGCCACAGCATCATCTTC -3'<br>R: 5'- CACTGAGGTTACCATCCTTGG -3'       | 60      |
| GAPDH         | NM_002046.7      | F: 5'- GCACCGTCAAGGCTGAGAAC -3'<br>R: 5'- GTGGTGAAGACGCCAGTGGA -3'         | 60      |

**Table S1.** Human primer sequences using qRT-PCR.

**Table S2**

| Gene   | Accession number | Sequence (5' – 3')                                                       | Tm (°C) |
|--------|------------------|--------------------------------------------------------------------------|---------|
| PEDF   | NM_177927        | F: 5'- GATTGCCCAGCTGCCTTTGACA -3'<br>R: 5'-GGGACAGTCAGCACAGCTTGGATAG -3' | 60      |
| VEGF   | NM_031836.3      | F: 5'- ACGGACAGACAGACAGACAC -3'<br>R: 5'- CTTCTGGGCTCTTCTCTCTC -3'       | 55      |
| RDH5   | XM_008765056.3   | F: 5'- TGGAGCCTGGCTTCTTTC -3'<br>R: 5'- GTAGTGGGCCTGTATAGCTG -3'         | 55      |
| RDH11  | NM_001012193.1   | F: 5'- CCACAGCAAAGTACCAACA -3'<br>R: 5'- CCAACTGGCAATCACTGAAA -3'        | 55      |
| RDH13  | NM_001108468.1   | F: 5'- GCTGCCATGACCCTCATCAT -3'<br>R: 5'- CGTGGTCCAAACCAAGCAG -3'        | 55      |
| RDH14  | NM_001109276.1   | F: 5'- AAGAACTGCTACAGGAGGAGC -3'<br>R: 5'- CCCAGGTGGTTCCTCCAAA -3'       | 55      |
| LC3    | NM_022867.2      | F: 5'- CGTCTGGACAAGACCAAGT -3'<br>R: 5'- AGTGCTGTCCCGAATGTCTC -3'        | 55      |
| ATG7   | NM_001012097.1   | F: 5'- GAGGAGACCGTCTGAGCAAC -3'<br>R: 5'- TGACACAGGAAAGGGTGCAA -3'       | 55      |
| BECN1  | NM_053739.2      | F: 5'- TTTTCTGGACTGTGTGCAGC -3'<br>R: 5'- GCTTTTGTCCACTGCTCCTC -3'       | 55      |
| MFN2   | NM_130894.4      | F: 5'- TTGGATGGACTATGCTAGTG -3'<br>R: 5'- TCCTCCGACCACGAGAATG -3'        | 52      |
| PINK1  | NM_001106694.1   | F: 5'- CATGGCTTTGGATGGAGAGT -3'<br>R: 5'- TGGGAGTTTGCTCTTCAAGG -3'       | 55      |
| PARKIN | NM_020093.1      | F: 5'- CTGGCAGTCATTCTGGACAC -3'<br>R: 5'- CTCTCCACTCATCCGTTTG -3'        | 55      |
| GAPDH  | NM_017008.4      | F: 5'- TCCCTCAAGATTGTCAGCAA -3'<br>R: 5'- AGATCCACAACGGATACATT -3'       | 58      |

**Table S2.** Rat primer sequences using qRT-PCR.

**Table S3**

| Antibody                             | Company                  | Catalog number |
|--------------------------------------|--------------------------|----------------|
| VEGF                                 | Novus Biologicals        | NB100-664      |
| PEDF                                 | Lsbio                    | LS-C818719     |
| LC3                                  | Cell signaling           | NB100-2220     |
| PINK1                                | Abcam                    | Ab23707        |
| RDH11                                | Bioss                    | BS-6214R       |
| ATG7                                 | Santa Cruz Biotechnology | SC-8868        |
| GAPDH                                | AbFrontier               | LF-PA0018      |
| Alexa Fluor 594 goat anti-rabbit IgG | Invitrogen               | A11012         |
| Anti-HRP-conjugated mouse IgG        | Bio-rad                  | 1705047        |
| Anti-HRP-conjugated Rabbit IgG       | Bio-rad                  | 1721019        |

**Table S3.** Antibody list.
